# Supplementary material for: Multi-Omics Analysis of Gene and Protein Candidates Possibly Related to Tetrodotoxin Accumulation in the Skin of Takifugu flavidus
Source: MDPI journal article supplement (doi:10.3390/md19110639), 2021-11-15
Supplement: s1 [file s1]

**Table S1**

Polymerase read statistics

| Polymerase Read<br>Bases (G) | Polymerase Reads | Polymerase Read<br>Length(mean) | Polymerase Read N50 |
|------------------------------|------------------|---------------------------------|---------------------|
| 28.7                         | 583625           | 49169                           | 113836              |

\*Polymerase reads: High-quality sequencing reads produced by a single molecule

**Table S2**

Subreads statistics

| Subread base(G) | Subreads number | Average subreads<br>length | N50  |
|-----------------|-----------------|----------------------------|------|
| 27.88           | 11234648        | 2483                       | 2747 |

\*Subreads: Filtered polymerase read

**Table S3**

Classification statistics of CCS, FLNC and Consensus

| Read      | number | Min length | Max length | Mean length | N50  |
|-----------|--------|------------|------------|-------------|------|
| CCS       | 466891 | 57         | 15000      | 2847        | 3079 |
| FLNC      | 392939 | 52         | 14910      | 2736        | 2975 |
| Consensus | 31073  | 372        | 11772      | 2770        | 3051 |

\*CCS: The consensus sequence obtained after self-alignment correction

FLNC: a non-chimeric sequence with 3', 5' primers and a poly A tail

Consensus: Sequence after cluster and remove redundancy FLNC

**Table S4**

Illumina sequence data and mapping efficiency

| sample     | Raw Base(G) | Clean Base(G) | mapping efficiency |
|------------|-------------|---------------|--------------------|
| CON_4hS1   | 7.63        | 7.33          | 90.84%             |
| CON_4hS2   | 6.53        | 6.23          | 92.04%             |
| CON_4hS3   | 6.66        | 6.41          | 91.89%             |
| CON_8hS1   | 6.78        | 6.47          | 90.83%             |
| CON_8hS2   | 6.47        | 6.24          | 91.78%             |
| CON_8hS3   | 6.66        | 6.39          | 90.52%             |
| CON_12hS1  | 6.57        | 6.33          | 90.91%             |
| CON_12hS2  | 6.46        | 6.19          | 91.40%             |
| CON_12hS3  | 6.55        | 6.22          | 91.04%             |
| CON_24hS1  | 6.73        | 6.44          | 91.23%             |
| CON_24hS2  | 6.46        | 6.08          | 90.08%             |
| CON_24hS3  | 6.94        | 6.64          | 91.19%             |
| CON_72hS1  | 7.29        | 7.02          | 90.22%             |
| CON_72hS2  | 6.41        | 6.18          | 90.90%             |
| CON_72hS3  | 6.6         | 6.31          | 92.05%             |
| CON_168hS1 | 7.15        | 6.89          | 91.47%             |

|            |      |      |        |
|------------|------|------|--------|
| CON_168hS2 | 7.28 | 7    | 91.57% |
| CON_168hS3 | 7.28 | 7.01 | 91.12% |
| TTX_4hS1   | 6.84 | 6.57 | 91.56% |
| TTX_4hS2   | 7.07 | 6.67 | 88.31% |
| TTX_4hS3   | 6.83 | 6.6  | 91.06% |
| TTX_8hS1   | 7.23 | 6.85 | 91.88% |
| TTX_8hS2   | 6.31 | 6.03 | 91.11% |
| TTX_8hS3   | 6.49 | 6.25 | 91.61% |
| TTX_12hS1  | 6.6  | 6.16 | 91.50% |
| TTX_12hS2  | 8.2  | 7.99 | 90.38% |
| TTX_12hS3  | 6.28 | 6.06 | 91.98% |
| TTX_24hS1  | 6.53 | 6.33 | 90.42% |
| TTX_24hS2  | 7.04 | 6.8  | 90.07% |
| TTX_24hS3  | 6.27 | 6.17 | 90.44% |
| TTX_72hS1  | 6.51 | 6.3  | 91.38% |
| TTX_72hS2  | 6.83 | 6.52 | 91.07% |
| TTX_72hS3  | 6.67 | 6.4  | 91.79% |
| TTX_168hS1 | 6.41 | 6.09 | 90.84% |
| TTX_168hS2 | 6.73 | 6.49 | 91.16% |
| TTX_168hS3 | 6.62 | 6.37 | 91.48% |

**Table S5**

Consensus sequence length statistics before and after transcript correction

| Type              | Total<br>nucleotides | Total<br>number | Mean<br>length | Min<br>length | Max<br>length | N50  | N90  |
|-------------------|----------------------|-----------------|----------------|---------------|---------------|------|------|
| Before<br>correct | 86046645             | 31073           | 2770           | 372           | 11772         | 3051 | 1820 |
| After<br>correct  | 86036010             | 31073           | 2769           | 372           | 11774         | 3050 | 1820 |

**Table S6**

Polished consensus sequence map to the reference genome

| Total<br>reads | Total<br>mapped   | Unmapped        | Multiple<br>mapped | Uniquely<br>mapped | Reads map<br>to “+” | Reads map<br>to “-” |
|----------------|-------------------|-----------------|--------------------|--------------------|---------------------|---------------------|
| 31073          | 29502<br>(91.73%) | 2671<br>(8.27%) | 67<br>(0.22%)      | 28435<br>(91.51%)  | 14418<br>(46.4%)    | 14017<br>(45.11%)   |

**Table S7**

Number of peptides and proteins identified

| MS/MS spectrum database search analysis summary |                     |         |                        |                          |
|-------------------------------------------------|---------------------|---------|------------------------|--------------------------|
| Total spectra                                   | Matched<br>spectrum | Peptide | Identified<br>proteins | Quantifiable<br>proteins |
| 341245                                          | 46001               | 25204   | 4368                   | 4358                     |

**Table S8**

Number of differentially expressed protein

| Differentially expressed protein summary |                |                 |
|------------------------------------------|----------------|-----------------|
| TTX/CON                                  | regulated type | fold change>1.5 |
|                                          | up-regulated   | 50              |
|                                          | down-regulated | 150             |

**Table S9**

The primer sequence of differential expressed genes

| Gene Name    | Primer Sequence                                    |
|--------------|----------------------------------------------------|
| EF1 $\alpha$ | ACTGAGGTGAAGTCTGTGGAAA<br>TTTGGTGGGTTCGTTCTTGCTGTC |
| FOS          | TGCGACTCTTCTTCCCGTTG<br>CTTGATGCTGTCAGGTCGGT       |
| Satb2        | CCAGCGCTACAACGTCAAAC<br>GCAACGCTGCACATGATTCT       |
| IER2         | ATCCTGGCAGTGTGATCAG<br>CGGGCACTTCGCATAACCAT        |
| LMAN1        | TGATGGCGAAGAACGCAGAG<br>CACAGGCGGGTTTGATCCAT       |
| HOOK3        | GGAGGAACTTCGAAAGCCA<br>AGAGTCTCGTTCCGTCCTCA        |
| EGR1         | AGGCTCACGTCCCAAATCA<br>TGCGGATGTGAGTGGTAAGG        |
| AHNAK        | ATCACTCGCCGCATCACTAC<br>CTCCAGACTCATGCCGTAGC       |
| MYL4         | ATGTGGAGACGTGATGCGAG<br>TGAGCCCCTCCACAAAATCC       |
| CKM          | TCCTGACTTGTGCCGGTATG<br>GAATCGCCTGAAGACCTCCC       |
| TNNI2        | TGCTGACGCCATGTTGAAAG<br>CCTCCACATTCTTACGCCAGT      |
| TPM3         | CGGGGTCCATTACGCCTTTT<br>TTTGTCCAGCTCGTCCTCAG       |
| MYH7         | GGAGGACCGGAAGAATGTCG<br>GAGATGAGTGTGGCCTGCT        |
| CRYAB        | AAGGATGGTCCCGGCTTTAC<br>CAGCATCGGAGCGGATATGA       |
| TCAP         | AGAGCTACAACGCCGAATGG<br>AAGTGCCCACTCTGAAGACC       |
| TXLNB        | CAGTGACCCAGTTCAGGTCC<br>TGCTTCTTAGCGGAGGTGTC       |
| PYGM         | CCCTTGTCAGACCACGACAG<br>TGTGGGCGAGAGCAAAGTAG       |

|        |                      |
|--------|----------------------|
| PFKM   | ATATGCAACAGGGCGGAACA |
|        | GAGTTGGCAAAGATGCGACC |
| KPNA2  | AGAACCCCTCACCCCTTTA  |
|        | GCACCGTCCGTCAAGTATGA |
| ATP2A1 | CAACTTCTGGCTGCTTGCTG |
|        | GCGACAACTTCAGCACCTC  |
| Flnc   | CCGTAACTTCCTCGTCCCC  |
|        | ATGGTGATTGTGCCGTCCTT |

Supplementary Figures

Figure S1

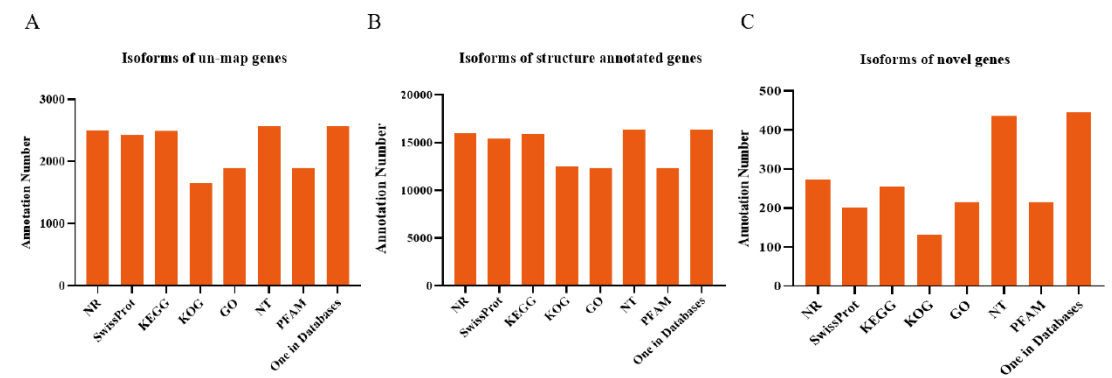

**Fig.S1** Functional annotation in seven databases (NR, NT, PFAM, KOG/COG, SwissProt, KEGG, GO). A. unmapped isoforms. B. the structurally annotated isoforms. C. the novel genes.

Figure S2

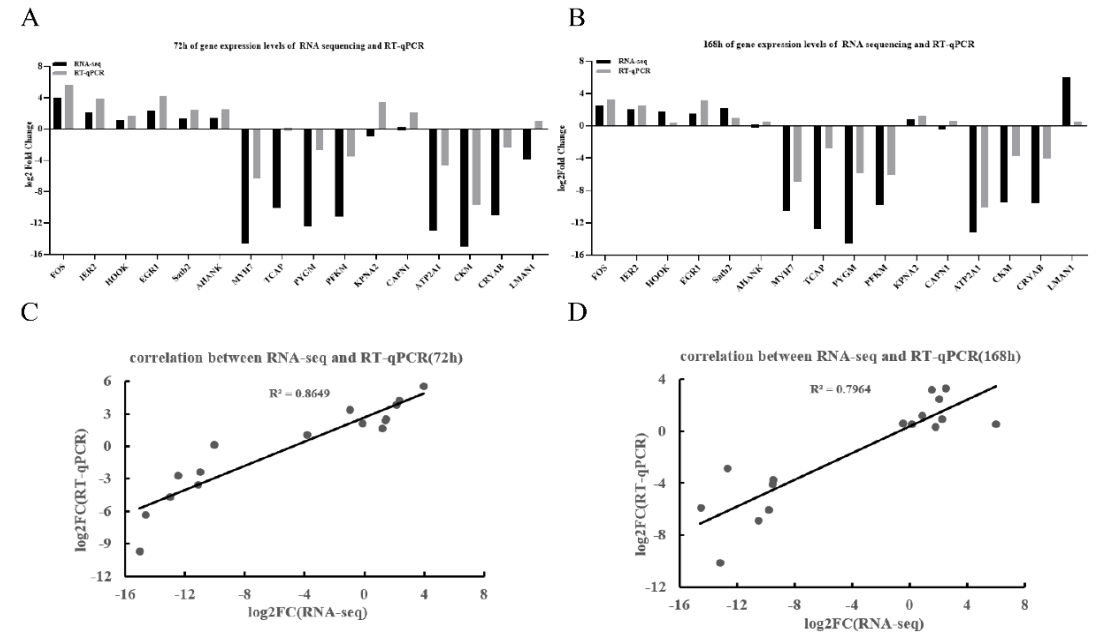

**Fig.S2** qPCR verity the RNA-seq result of DEGs. A(B). Comparison of gene expression levels of 16 DEGs of 72h (168h) between RNA sequencing and RT-qPCR analyses. C(D). Correlation analysis between RT-qPCR and RNA-Seq results of 16 DEGs of 72h (168h) indicating a positive correlation (linear-fitting method (R2)).

**Figure S3**

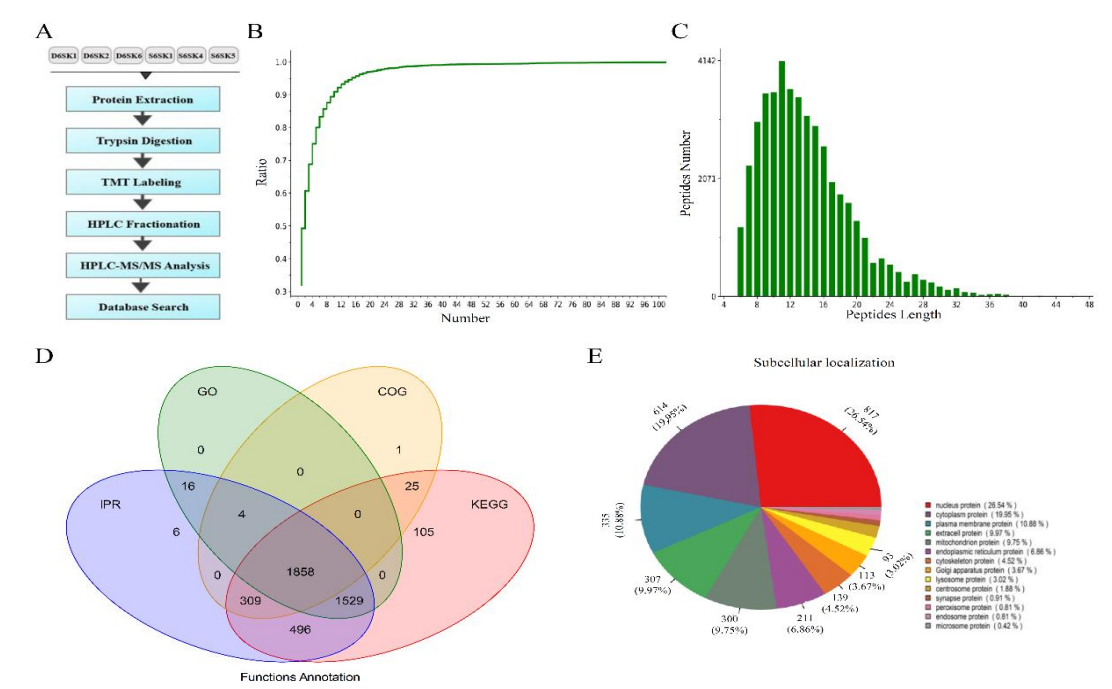

**Fig.S3** Quality control and functional annotation of identified proteins. A The procedure of the proteomic study. B. The distribution of Unique peptide number. C. Peptide length distribution identified by quantitative proteomic analysis. D. Functional annotation of the identified proteins. E. Subcellular localization of DEPs.
